# Supplementary material
Source: PubMed Central journal article supplement (PMC5032961)
Supplement: Supplement_14_March_2016.pdf [file Supplement_14_March_2016.pdf]

## Supplementary Appendix

This appendix has been provided by the authors to give readers additional information about their work.

Supplement to:

Glycaemic control, renal complications and current smoking in relation to excess risk of mortality in persons with type 1 diabetes

Elsa Ahlén, Aldina Pivodic, Hans Wedel, Sofia Dahlqvist, Mikhail Kosiborod, Marcus Lind

***1 Table of contents***

1 Table of contents ..... 2

2 Inpatient Registry and ICD Codes..... 3

3 Tables ..... 4

    3.1 Table S1. Unadjusted and adjusted hazard ratios for all-cause and CVD mortality and 95% confidence intervals for time-updated mean HbA1c categories and time updated normoalbuminuria examined by Cox regression..... 4

    3.2 Table S2. Unadjusted and adjusted hazard ratios for all-cause and CVD mortality and 95% confidence intervals for time-updated mean HbA1c categories and time updated eGFR examined by Cox regression ..... 5

## ***2 Inpatient Registry and ICD Codes***

The Inpatient Registry and cause of death registry includes mandatory information on all principal and secondary hospital discharge diagnoses, deaths, and causes of deaths. The Inpatient Registry was first used in the 1960s, with nationwide coverage beginning in 1987. Diagnoses in the Inpatient Registry are classified according to the International Classification of Diseases (ICD) system. Dates and causes of death were collected from the cause of death registry. The following ICD-10 codes from death registry were used for defining death due to ketoacidosis or hypoglycaemia and from inpatient registry for defining diagnosis of ketoacidosis and hypoglycemia: E100, E101, E110, E111, E140, E141 and E162. The corresponding ICD-9 codes are: 250A, 251A, 251B and 251C. The acute intoxication was defined by using following codes from the inpatient registry: ICD-10 F100, F110, F120, F130, F140 and F160; ICD-9 303 and 305.

### 3 Tables

**3.1 Table S1. Unadjusted and adjusted hazard ratios for all-cause and CVD mortality and 95% confidence intervals for time-updated mean HbA1c categories and time updated normoalbuminuria examined by Cox regression**

|                                                                                                                                                                                                                                                                                                                                                                                                                                                              | Hazard ratio (95% CI)<br>p-value |                                 |                                 |                                |
|--------------------------------------------------------------------------------------------------------------------------------------------------------------------------------------------------------------------------------------------------------------------------------------------------------------------------------------------------------------------------------------------------------------------------------------------------------------|----------------------------------|---------------------------------|---------------------------------|--------------------------------|
|                                                                                                                                                                                                                                                                                                                                                                                                                                                              | Model 1                          | Model 2                         | Model 3                         | Model 4                        |
| <b>All-cause mortality</b>                                                                                                                                                                                                                                                                                                                                                                                                                                   |                                  |                                 |                                 |                                |
| Controls (reference)                                                                                                                                                                                                                                                                                                                                                                                                                                         | 1.00                             | 1.00                            | 1.00                            | 1.00                           |
| <=6.9% (<=52 mmol/mol) - Normoalbuminuria                                                                                                                                                                                                                                                                                                                                                                                                                    | 1.24 (1.00 - 1.55)<br>0.049      | 1.32 (1.09 - 1.61)<br>0.0047    | 1.31 (1.08 - 1.59)<br>0.0067    | 1.35 (1.11 - 1.64)<br>0.0027   |
| 7.0-7.8% (53-62 mmol/mol) - Normoalbuminuria                                                                                                                                                                                                                                                                                                                                                                                                                 | 1.55 (1.33 - 1.80)<br><.0001     | 1.49 (1.31 - 1.71)<br><.0001    | 1.50 (1.31 - 1.71)<br><.0001    | 1.46 (1.28 - 1.68)<br><.0001   |
| 7.9-8.7% (63-72 mmol/mol) - Normoalbuminuria                                                                                                                                                                                                                                                                                                                                                                                                                 | 1.99 (1.72 - 2.32)<br><.0001     | 1.86 (1.63 - 2.11)<br><.0001    | 1.88 (1.65 - 2.14)<br><.0001    | 1.77 (1.55 - 2.02)<br><.0001   |
| 8.8-9.6% 73-82 (mmol/mol) - Normoalbuminuria                                                                                                                                                                                                                                                                                                                                                                                                                 | 2.32 (1.85 - 2.91)<br><.0001     | 2.49 (2.06 - 3.00)<br><.0001    | 2.51 (2.08 - 3.03)<br><.0001    | 2.29 (1.89 - 2.77)<br><.0001   |
| >=9.7% (>=83 mmol/mol) - Normoalbuminuria                                                                                                                                                                                                                                                                                                                                                                                                                    | 5.57 (3.93 - 7.89)<br><.0001     | 5.89 (4.65 - 7.47)<br><.0001    | 5.77 (4.55 - 7.31)<br><.0001    | 5.17 (4.08 - 6.55)<br><.0001   |
| <=6.9% (<=52 mmol/mol) - Not Normoalbuminuria                                                                                                                                                                                                                                                                                                                                                                                                                | 5.15 (3.96 - 6.71)<br><.0001     | 4.80 (4.00 - 5.76)<br><.0001    | 4.80 (3.99 - 5.76)<br><.0001    | 4.30 (3.58 - 5.17)<br><.0001   |
| 7.0-7.8% (53-62 mmol/mol) - Not Normoalbuminuria                                                                                                                                                                                                                                                                                                                                                                                                             | 4.86 (4.10 - 5.76)<br><.0001     | 4.41 (3.91 - 4.97)<br><.0001    | 4.41 (3.91 - 4.98)<br><.0001    | 3.74 (3.31 - 4.23)<br><.0001   |
| 7.9-8.7% (63-72 mmol/mol) - Not Normoalbuminuria                                                                                                                                                                                                                                                                                                                                                                                                             | 5.95 (5.12 - 6.92)<br><.0001     | 5.40 (4.87 - 5.99)<br><.0001    | 5.47 (4.93 - 6.07)<br><.0001    | 4.80 (4.32 - 5.33)<br><.0001   |
| 8.8-9.6% 73-82 (mmol/mol) - Not Normoalbuminuria                                                                                                                                                                                                                                                                                                                                                                                                             | 5.66 (4.64 - 6.90)<br><.0001     | 5.79 (5.05 - 6.63)<br><.0001    | 5.92 (5.16 - 6.78)<br><.0001    | 5.04 (4.39 - 5.79)<br><.0001   |
| >=9.7% (>=83 mmol/mol) - Not Normoalbuminuria                                                                                                                                                                                                                                                                                                                                                                                                                | 15.07 (11.21 - 20.26)<br><.0001  | 13.20 (11.38 - 15.31)<br><.0001 | 13.57 (11.70 - 15.75)<br><.0001 | 10.65 (9.16 - 12.39)<br><.0001 |
| <b>CVD mortality</b>                                                                                                                                                                                                                                                                                                                                                                                                                                         |                                  |                                 |                                 |                                |
| Controls (reference)                                                                                                                                                                                                                                                                                                                                                                                                                                         | 1.00                             | 1.00                            | 1.00                            | 1.00                           |
| <=6.9% (<=52 mmol/mol) - Normoalbuminuria                                                                                                                                                                                                                                                                                                                                                                                                                    | 1.10 (0.72 - 1.68)<br>0.65       | 1.16 (0.79 - 1.70)<br>0.44      | 1.17 (0.80 - 1.71)<br>0.43      | 1.21 (0.82 - 1.77)<br>0.34     |
| 7.0-7.8% (53-62 mmol/mol) - Normoalbuminuria                                                                                                                                                                                                                                                                                                                                                                                                                 | 2.23 (1.72 - 2.89)<br><.0001     | 2.02 (1.63 - 2.51)<br><.0001    | 2.03 (1.63 - 2.52)<br><.0001    | 1.89 (1.52 - 2.35)<br><.0001   |
| 7.9-8.7% (63-72 mmol/mol) - Normoalbuminuria                                                                                                                                                                                                                                                                                                                                                                                                                 | 2.49 (1.88 - 3.29)<br><.0001     | 2.11 (1.68 - 2.66)<br><.0001    | 2.13 (1.69 - 2.68)<br><.0001    | 1.90 (1.51 - 2.39)<br><.0001   |
| 8.8-9.6% 73-82 (mmol/mol) - Normoalbuminuria                                                                                                                                                                                                                                                                                                                                                                                                                 | 2.55 (1.67 - 3.89)<br><.0001     | 2.90 (2.05 - 4.09)<br><.0001    | 2.92 (2.06 - 4.12)<br><.0001    | 2.41 (1.70 - 3.40)<br><.0001   |
| >=9.7% (>=83 mmol/mol) - Normoalbuminuria                                                                                                                                                                                                                                                                                                                                                                                                                    | 5.88 (2.91 - 11.88)<br><.0001    | 6.12 (3.84 - 9.75)<br><.0001    | 6.15 (3.86 - 9.81)<br><.0001    | 5.07 (3.18 - 8.08)<br><.0001   |
| <=6.9% (<=52 mmol/mol) - Not Normoalbuminuria                                                                                                                                                                                                                                                                                                                                                                                                                | 5.59 (3.57 - 8.75)<br><.0001     | 5.25 (3.88 - 7.12)<br><.0001    | 5.24 (3.87 - 7.10)<br><.0001    | 4.20 (3.10 - 5.70)<br><.0001   |
| 7.0-7.8% (53-62 mmol/mol) - Not Normoalbuminuria                                                                                                                                                                                                                                                                                                                                                                                                             | 5.37 (4.05 - 7.12)<br><.0001     | 5.15 (4.23 - 6.28)<br><.0001    | 5.12 (4.20 - 6.25)<br><.0001    | 4.02 (3.29 - 4.92)<br><.0001   |
| 7.9-8.7% (63-72 mmol/mol) - Not Normoalbuminuria                                                                                                                                                                                                                                                                                                                                                                                                             | 7.15 (5.54 - 9.22)<br><.0001     | 6.90 (5.84 - 8.16)<br><.0001    | 6.90 (5.84 - 8.16)<br><.0001    | 5.57 (4.70 - 6.61)<br><.0001   |
| 8.8-9.6% 73-82 (mmol/mol) - Not Normoalbuminuria                                                                                                                                                                                                                                                                                                                                                                                                             | 6.99 (4.94 - 9.91)<br><.0001     | 7.50 (5.98 - 9.39)<br><.0001    | 7.56 (6.03 - 9.47)<br><.0001    | 5.86 (4.67 - 7.37)<br><.0001   |
| >=9.7% (>=83 mmol/mol) - Not Normoalbuminuria                                                                                                                                                                                                                                                                                                                                                                                                                | 18.73 (10.41 - 33.70)<br><.0001  | 14.89 (11.37 - 19.51)<br><.0001 | 14.98 (11.43 - 19.64)<br><.0001 | 9.90 (7.50 - 13.06)<br><.0001  |
| Model 1 (98.5% individuals with non-missing data): unadjusted model, matched for age and sex<br>Model 2 (98.5% individuals with non-missing data): adjusted for time-updated age and sex<br>Model 3 (98.5% individuals with non-missing data): additionally stratified for diabetes duration at baseline<br>Model 4 (97.4% individuals with non-missing data): additionally adjusted for born in Sweden, maximum education level and baseline comorbidities. |                                  |                                 |                                 |                                |

**3.2 Table S2. Unadjusted and adjusted hazard ratios for all-cause and CVD mortality and 95% confidence intervals for time-updated mean HbA1c categories and time updated eGFR examined by Cox regression**

|                                                                                                                                                                                                                                                                                                                                                                                                                                                              | Hazard ratio (95% CI)<br>p-value |                                 |                                 |                                 |
|--------------------------------------------------------------------------------------------------------------------------------------------------------------------------------------------------------------------------------------------------------------------------------------------------------------------------------------------------------------------------------------------------------------------------------------------------------------|----------------------------------|---------------------------------|---------------------------------|---------------------------------|
|                                                                                                                                                                                                                                                                                                                                                                                                                                                              | Model 1                          | Model 2                         | Model 3                         | Model 4                         |
| <b>All-cause mortality</b>                                                                                                                                                                                                                                                                                                                                                                                                                                   |                                  |                                 |                                 |                                 |
| Controls (reference)                                                                                                                                                                                                                                                                                                                                                                                                                                         | 1.00                             | 1.00                            | 1.00                            | 1.00                            |
| <=6.9% (<=52 mmol/mol) - eGFR>=60                                                                                                                                                                                                                                                                                                                                                                                                                            | 1.41 (1.15 - 1.72)<br>0.0008     | 1.47 (1.23 - 1.76)<br><.0001    | 1.46 (1.22 - 1.74)<br><.0001    | 1.50 (1.26 - 1.80)<br><.0001    |
| 7.0-7.8% (53-62 mmol/mol) - eGFR>=60                                                                                                                                                                                                                                                                                                                                                                                                                         | 1.73 (1.50 - 1.98)<br><.0001     | 1.63 (1.44 - 1.84)<br><.0001    | 1.64 (1.45 - 1.85)<br><.0001    | 1.57 (1.39 - 1.78)<br><.0001    |
| 7.9-8.7% (63-72 mmol/mol) - eGFR>=60                                                                                                                                                                                                                                                                                                                                                                                                                         | 2.37 (2.09 - 2.69)<br><.0001     | 2.20 (1.97 - 2.44)<br><.0001    | 2.22 (2.00 - 2.48)<br><.0001    | 2.12 (1.90 - 2.36)<br><.0001    |
| 8.8-9.6% 73-82 (mmol/mol) - eGFR>=60                                                                                                                                                                                                                                                                                                                                                                                                                         | 2.43 (2.02 - 2.93)<br><.0001     | 2.61 (2.24 - 3.05)<br><.0001    | 2.65 (2.27 - 3.09)<br><.0001    | 2.45 (2.10 - 2.86)<br><.0001    |
| >=9.7% (>=83 mmol/mol) - eGFR>=60                                                                                                                                                                                                                                                                                                                                                                                                                            | 7.75 (5.88 - 10.22)<br><.0001    | 7.23 (6.07 - 8.60)<br><.0001    | 7.16 (6.01 - 8.53)<br><.0001    | 6.27 (5.26 - 7.47)<br><.0001    |
| <=6.9% (<=52 mmol/mol) - eGFR<60                                                                                                                                                                                                                                                                                                                                                                                                                             | 5.68 (4.24 - 7.61)<br><.0001     | 5.19 (4.26 - 6.31)<br><.0001    | 5.16 (4.24 - 6.28)<br><.0001    | 4.41 (3.62 - 5.38)<br><.0001    |
| 7.0-7.8% (53-62 mmol/mol) - eGFR<60                                                                                                                                                                                                                                                                                                                                                                                                                          | 5.47 (4.52 - 6.62)<br><.0001     | 5.24 (4.59 - 5.97)<br><.0001    | 5.21 (4.57 - 5.95)<br><.0001    | 4.33 (3.78 - 4.95)<br><.0001    |
| 7.9-8.7% (63-72 mmol/mol) - eGFR<60                                                                                                                                                                                                                                                                                                                                                                                                                          | 7.48 (6.20 - 9.02)<br><.0001     | 6.47 (5.74 - 7.29)<br><.0001    | 6.50 (5.76 - 7.32)<br><.0001    | 5.37 (4.76 - 6.07)<br><.0001    |
| 8.8-9.6% 73-82 (mmol/mol) - eGFR<60                                                                                                                                                                                                                                                                                                                                                                                                                          | 8.60 (6.62 - 11.18)<br><.0001    | 8.45 (7.21 - 9.90)<br><.0001    | 8.60 (7.33 - 10.07)<br><.0001   | 6.69 (5.70 - 7.86)<br><.0001    |
| >=9.7% (>=83 mmol/mol) - eGFR<60                                                                                                                                                                                                                                                                                                                                                                                                                             | 15.35 (10.77 - 21.89)<br><.0001  | 15.76 (13.24 - 18.74)<br><.0001 | 16.20 (13.61 - 19.28)<br><.0001 | 12.71 (10.65 - 15.16)<br><.0001 |
| <b>CVD mortality</b>                                                                                                                                                                                                                                                                                                                                                                                                                                         |                                  |                                 |                                 |                                 |
| Controls (reference)                                                                                                                                                                                                                                                                                                                                                                                                                                         | 1.00                             | 1.00                            | 1.00                            | 1.00                            |
| <=6.9% (<=52 mmol/mol) - eGFR>=60                                                                                                                                                                                                                                                                                                                                                                                                                            | 1.26 (0.86 - 1.86)<br>0.24       | 1.30 (0.92 - 1.83)<br>0.14      | 1.31 (0.93 - 1.85)<br>0.13      | 1.33 (0.94 - 1.88)<br>0.11      |
| 7.0-7.8% (53-62 mmol/mol) - eGFR>=60                                                                                                                                                                                                                                                                                                                                                                                                                         | 2.25 (1.76 - 2.87)<br><.0001     | 1.95 (1.59 - 2.39)<br><.0001    | 1.96 (1.59 - 2.40)<br><.0001    | 1.80 (1.46 - 2.21)<br><.0001    |
| 7.9-8.7% (63-72 mmol/mol) - eGFR>=60                                                                                                                                                                                                                                                                                                                                                                                                                         | 3.22 (2.56 - 4.04)<br><.0001     | 2.79 (2.32 - 3.34)<br><.0001    | 2.80 (2.34 - 3.36)<br><.0001    | 2.52 (2.10 - 3.03)<br><.0001    |
| 8.8-9.6% 73-82 (mmol/mol) - eGFR>=60                                                                                                                                                                                                                                                                                                                                                                                                                         | 3.02 (2.16 - 4.23)<br><.0001     | 3.28 (2.51 - 4.29)<br><.0001    | 3.32 (2.54 - 4.33)<br><.0001    | 2.83 (2.16 - 3.70)<br><.0001    |
| >=9.7% (>=83 mmol/mol) - eGFR>=60                                                                                                                                                                                                                                                                                                                                                                                                                            | 10.64 (5.78 - 19.61)<br><.0001   | 7.47 (5.28 - 10.56)<br><.0001   | 7.50 (5.30 - 10.60)<br><.0001   | 5.74 (4.06 - 8.13)<br><.0001    |
| <=6.9% (<=52 mmol/mol) - eGFR<60                                                                                                                                                                                                                                                                                                                                                                                                                             | 6.03 (3.75 - 9.70)<br><.0001     | 6.02 (4.39 - 8.24)<br><.0001    | 5.98 (4.37 - 8.20)<br><.0001    | 4.71 (3.43 - 6.47)<br><.0001    |
| 7.0-7.8% (53-62 mmol/mol) - eGFR<60                                                                                                                                                                                                                                                                                                                                                                                                                          | 6.23 (4.60 - 8.45)<br><.0001     | 6.70 (5.46 - 8.21)<br><.0001    | 6.68 (5.45 - 8.19)<br><.0001    | 5.08 (4.13 - 6.26)<br><.0001    |
| 7.9-8.7% (63-72 mmol/mol) - eGFR<60                                                                                                                                                                                                                                                                                                                                                                                                                          | 7.93 (5.79 - 10.85)<br><.0001    | 7.57 (6.22 - 9.22)<br><.0001    | 7.59 (6.24 - 9.24)<br><.0001    | 5.78 (4.73 - 7.06)<br><.0001    |
| 8.8-9.6% 73-82 (mmol/mol) - eGFR<60                                                                                                                                                                                                                                                                                                                                                                                                                          | 9.72 (6.19 - 15.28)<br><.0001    | 10.66 (8.20 - 13.87)<br><.0001  | 10.70 (8.22 - 13.92)<br><.0001  | 7.34 (5.62 - 9.60)<br><.0001    |
| >=9.7% (>=83 mmol/mol) - eGFR<60                                                                                                                                                                                                                                                                                                                                                                                                                             | 13.80 (7.52 - 25.31)<br><.0001   | 17.31 (12.73 - 23.53)<br><.0001 | 17.50 (12.87 - 23.81)<br><.0001 | 12.11 (8.84 - 16.59)<br><.0001  |
| Model 1 (98.9% individuals with non-missing data): unadjusted model, matched for age and sex<br>Model 2 (98.9% individuals with non-missing data): adjusted for time-updated age and sex<br>Model 3 (98.9% individuals with non-missing data): additionally stratified for diabetes duration at baseline<br>Model 4 (97.8% individuals with non-missing data): additionally adjusted for born in Sweden, maximum education level and baseline comorbidities. |                                  |                                 |                                 |                                 |
